# Supplementary material for: Five-year psychological impact and surveillance compliance in the Australian Pancreatic Cancer Screening Program
Source: Research Square preprint supplement (doi:10.21203/rs.3.rs-7732042/v1), 2025-10-15
Supplement: Supplementary file 1 [file 73147b69cff5c327b3fd6ebc.docx]

**Five-year psychological impact and surveillance compliance in the Australian Pancreatic Cancer Screening Program, Familial Cancer, Tanya M Dwarte, David K E Chan, Nick Olsen, David B Williams, Anthony J Gill; Alina Stoita**

**Corresponding Author: Dr Alina Stoita, Department of Gastroenterology, St Vincent’s Hospital, Darlinghurst, NSW Australia 2010. Email:** [**alina.stoita@svha.org.au**](mailto:alina.stoita@svha.org.au)

**Table S1** Summary of Impact of Event Scale scores using generalized linear mixed model analyses

| **Impact of Event Scale** | **Estimated Marginal Mean (95% HPD CI)** | |
| --- | --- | --- |
| **Intrusion** | **Available case analysis** | **Multiple imputation** |
| Baseline | 8.19 (4.59 to 11.83) | 7.69 (4.20 to 11.17) |
| 1-Month | 5.02 (0.61 to 8.25) | 4.07 (0.53 to 7.62) |
| 1-Year | 5.46 (1.29 to 8.80) | 3.86 (0.32 to 7.39) |
| 5-Years | 6.32 (2.13 to 9.87) | 4.23 (0.67 to 7.80) |
| **Avoidance** |  |  |
| Baseline | 9.22 (3.68 to 14.11) | 8.75 (3.87 to 13.63) |
| 1-Month | 6.19 (0.73 to 11.20) | 5.29 (0.37 to 10.21) |
| 1-Year | 6.58 (1.12 to 11.93) | 4.65 (-0.26 to 9.56)a |
| 5-Years | 8.58 (2.95 to 13.70) | 5.59 (0.62 to 10.56) |
| **Total** |  |  |
| Baseline | 18.65 (9.68 to 25.60) | 17.72 (10.48 to 24.96) |
| 1-Month | 12.56 (4.32 to 20.16) | 10.96 (3.66 to 18.27) |
| 1-Year | 13.58 (5.29 to 20.90) | 10.35 (3.07 to 17.63) |
| 5-Years | 16.17 (7.73 to 23.64) | 11.57 (4.22 to 18.92) |

a 95% HDP CI exceeded the lower limit

Abbreviations: CI, confidence interval; HPD, highest posterior density

**Table S2** Estimated Marginal Means for Negative and Positive Psychological Consequences Questionnaire scores using generalized linear mixed model analyses

| **Psychological Consequences Questionnaire** | **Estimated Marginal Mean (95% HPD CI)** | | | |
| --- | --- | --- | --- | --- |
| **Negative PCQ** | | **Positive PCQ** | |
| **Emotional** | **Available case analysis** | **Multiple imputation** | **Available case analysis** | **Multiple imputation** |
| Baseline | 1.36 (-0.88 to 3.61)a | 1.48 (-0.52 to 3.47)a | - | - |
| 1-Month | 0.60 (-2.13 to 2.41)a | 0.40 (-1.62 to 2.43)a | 10.97 (8.28 to 13.99) | 10.82 (8.67 to 12.97) |
| 1-Year | 0.88 (-1.50 to 3.01)a | 0.26 (-1.77 to 2.29)a | 12.11 (9.40 to 15.17)c | 12.08 (9.93 to 14.23) |
| 5-Years | 1.25 (-1.17 to 3.40)a | 0.07 (-1.98 to 2.11)a | 13.84 (11.06 to 17.01)c | 13.35 (11.12 to 15.59)c |
| **Physical** |  |  |  |  |
| Baseline | -1.66 (-4.66 to 1.09)b | -1.59 (-3.81 to 0.63)b | - | - |
| 1-Month | -2.30 (-5.59 to 0.48)b | -2.65 (-4.92 to -0.39)b | 3.38 (-0.17 to 7.14)a | 3.23 (0.32 to 6.15) |
| 1-Year | -2.05 (-5.61 to 0.53)b | -2.60 (-4.85 to -0.34)b | 3.33 (-0.12 to 7.18)a | 3.37 (0.46 to 6.28) |
| 5-Years | -1.43 (-4.87 to 1.25)b | -2.82 (-5.12 to -0.52)b | 5.81 (1.89 to 9.50)c | 5.89 (2.92 to 8.87) |
| **Social** |  |  |  |  |
| Baseline | -1.95 (-9.55 to 0.24)b | -1.92 (-3.99 to 0.16)b | - | - |
| 1-Month | -2.27 (-9.65 to 0.13)b | -2.55 (-4.64 to -0.47)b | 1.69 (-0.72 to 4.10)a | 1.72 (-0.34 to 3.77)a |
| 1-Year | -1.82 (-9.27 to 0.59)b | -2.26 (-4.38 to -0.15)b | 1.72 (-0.58 to 4.35)a | 1.95 (-0.11 to 4.01)a |
| 5-Years | -1.37 (-8.87 to 0.98)b | -2.83 (-5.04 to -0.62)b | 3.35 (1.03 to 5.98) | 3.60 (1.54 to 5.66) |
| **Total** |  |  |  |  |
| Baseline | 2.85 (-1.76 to 7.00)a | 3.06 (-0.69 to 6.81)a | - | - |
| 1-Month | 1.44 (-3.34 to 5.62)a | 1.04 (-2.74 to 4.81)a | 18.28 (14.03 to 23.14) | 17.57 (13.73 to 21.41) |
| 1-Year | 2.04 (-2.10 to 7.08)a | 1.06 (-2.73 to 4.85)a | 19.27 (14.89 to 23.78) | 18.82 (14.95 to 22.68) |
| 5-Years | 3.08 (-1.93 to 6.94)a | 0.52 (-3.34 to 4.38)a | 23.27 (18.62 to 28.00) | 22.27 (18.35 to 26.18) |

a 95% HDP CI exceeded the lower limit

b Estimated marginal mean and 95% HPD CI exceeded the lower limit

c 95% HPD CI exceeded the upper limit

Abbreviations: CI, confidence interval; EUS, endoscopic ultrasound; FPC, Familial Pancreatic Cancer; HPD, highest posterior density; MRI, Magnetic resonance imaging; PDAC, pancreatic ductal adenocarcinoma; PHx, personal history
